# Supplementary material for: Spectral Observations at the CILBO Observatory: Calibration and Data Sets
Source: Copernicus journal article supplement (doi:10.5194/egusphere-2022-416), 2022-07-08
Supplement: Supplementary file [file egusphere-2022-416-AC4-supplement.pdf]

One of the reviewers commented on the interpretation of the chain plot presented in Figure 7.

One of the co-authors, indicated a better way to check the convergence of the parameters, that is the corner plot.

We have thus decided to replace the chain plot by the corner plot, and had to modify a number of paragraphs in the manuscript. This change allowed us to give some more, hopefully clearer, description of how to validate the convergence of the parameters of the MonteCarlo chain was applied.

A standard output of the pipeline is a figure as follows:

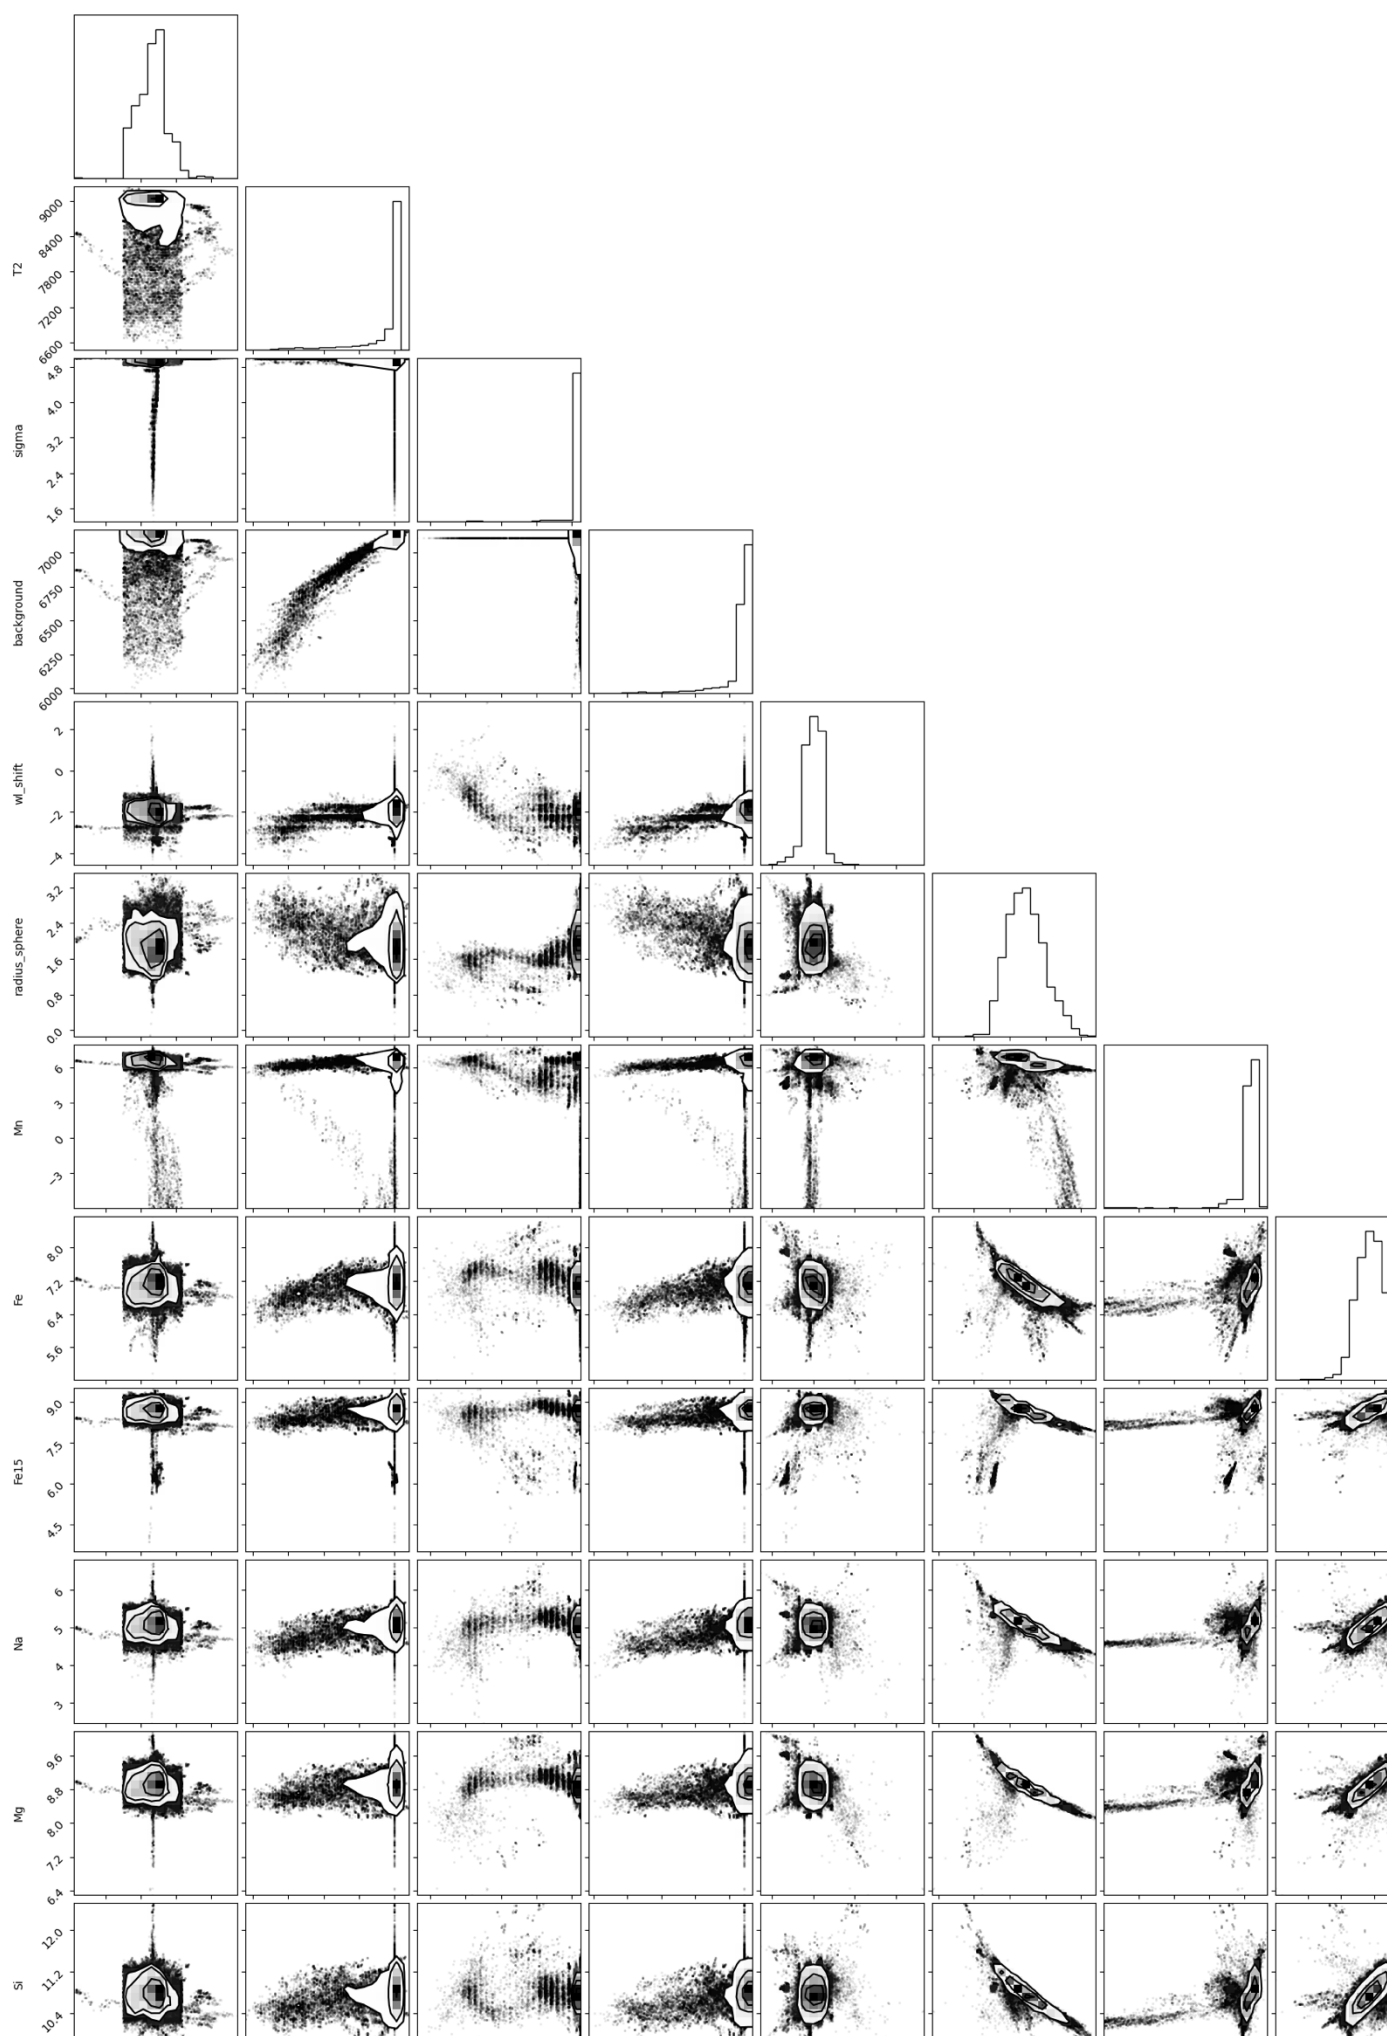

As such a plot can not be used in a manuscript, we have produced a subplot showing only 6 parameters (4 chemical elements):

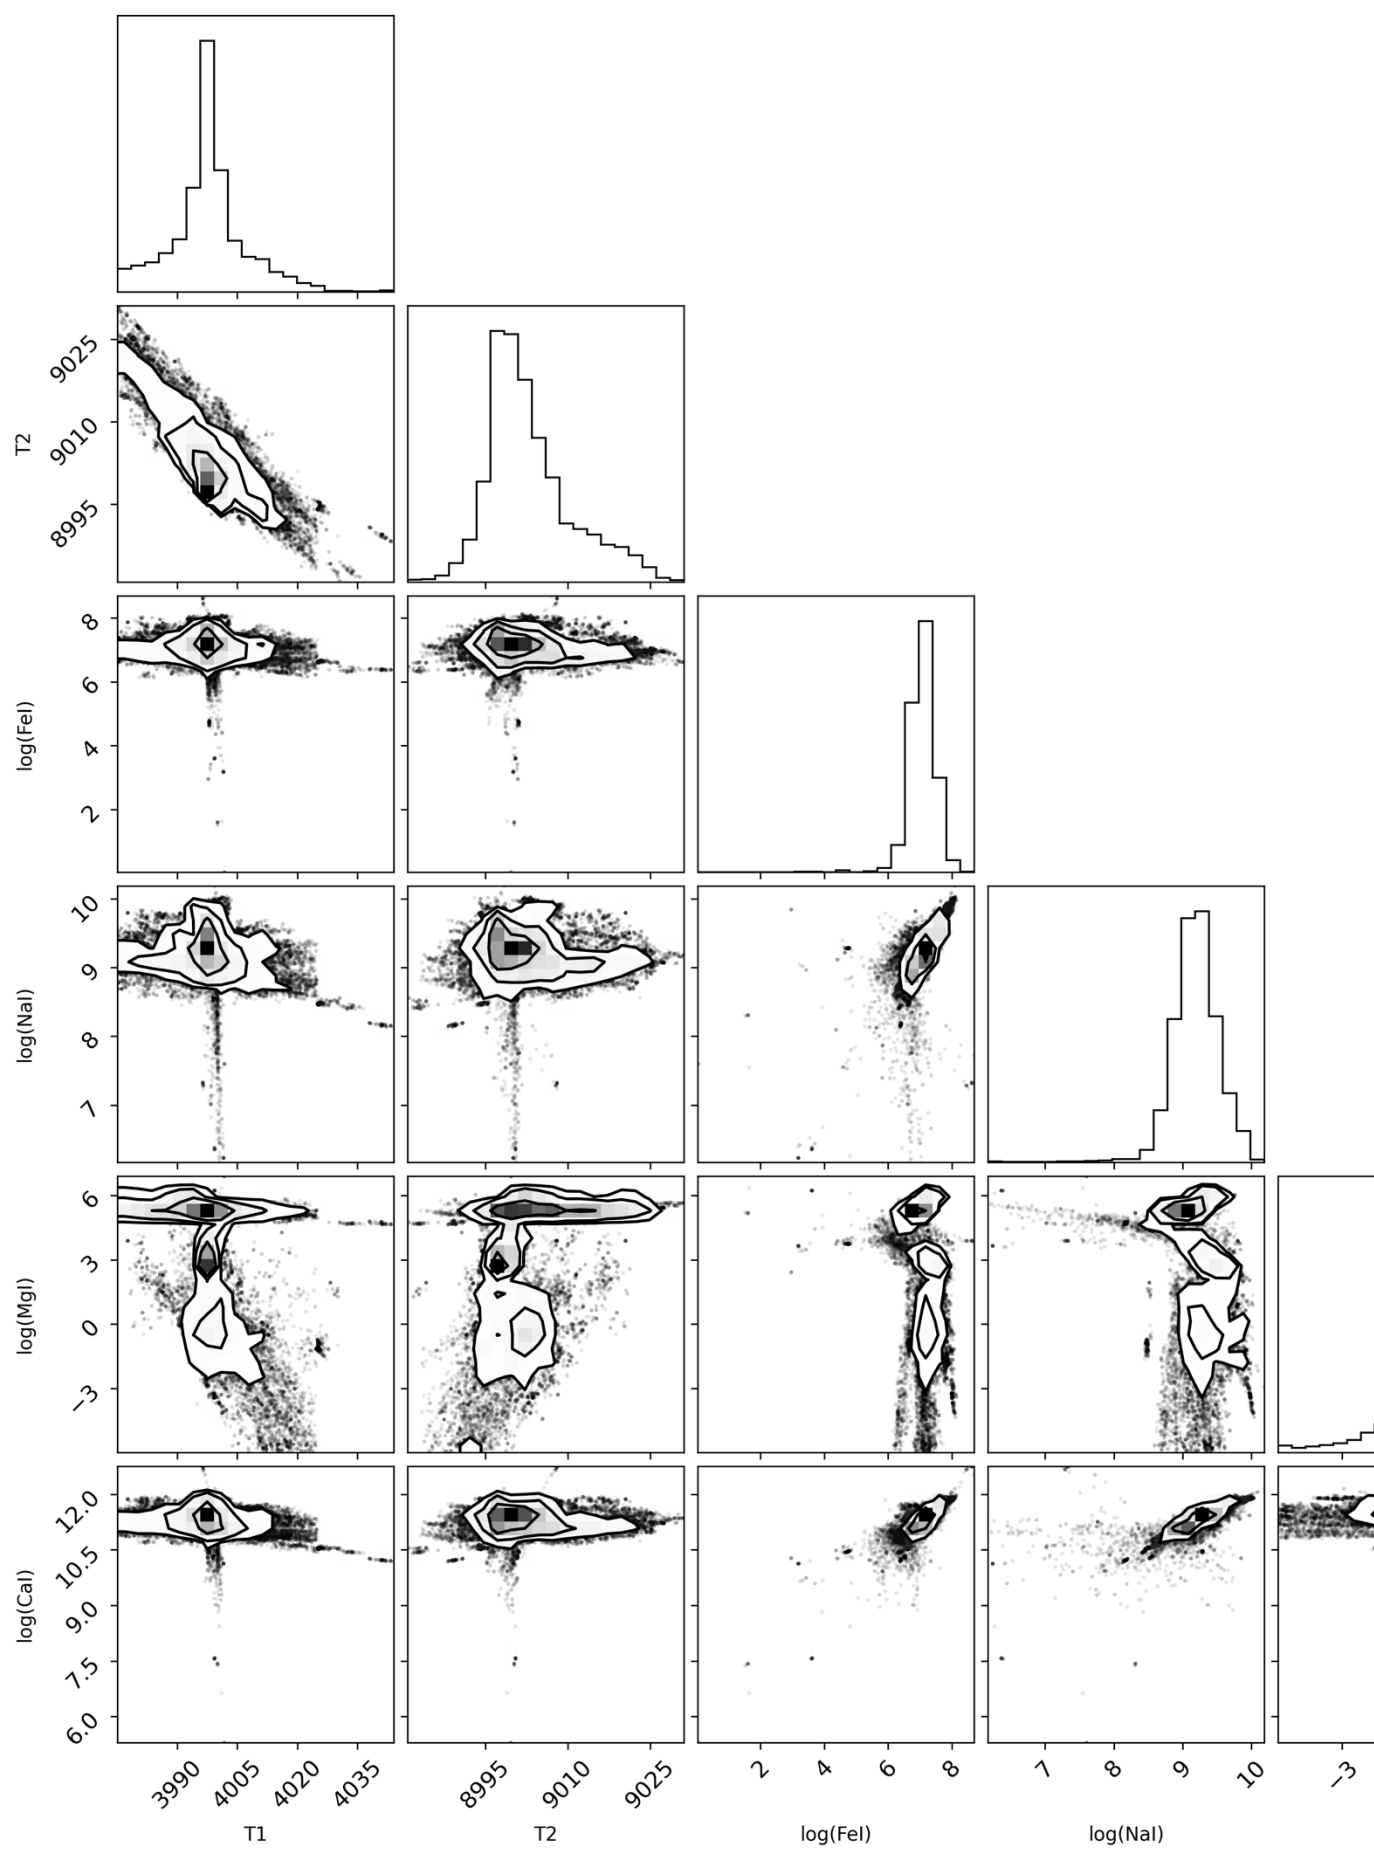

We hope that with this replacement and the additional text in the manuscript this validation step is clearer.
